# Supplementary material for: Using Trichoderma asperellum to Antagonize Lasiodiplodia theobromae Causing Stem-End Rot Disease on Pomelo (Citrus maxima)
Source: MDPI journal article supplement (doi:10.3390/jof9100981), 2023-09-29
Supplement: s1 [file s1]

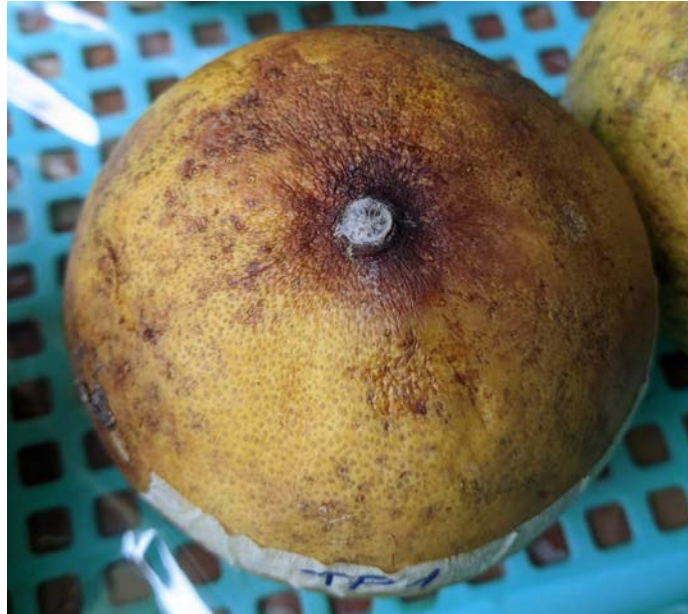

**Figure S1:** Pomelo fruit with symptoms of stem-end rot disease after 5 days incubation.

**Table S1:** Coordinates of isolating the causing factors of pomelo stem end rot disease and *Trichoderma* antagonists.

| No. | Pathogenic strains | <i>Trichoderma</i> strain | Coordinate                                                  |
|-----|--------------------|---------------------------|-------------------------------------------------------------|
| 1   |                    | T-SP01                    |                                                             |
|     |                    | T-SP02                    |                                                             |
|     |                    | T-SP03                    | 10°10'25.8"N 106°29'05.7"E<br>10.173833, 106.484908         |
|     |                    | T-SP04                    | Binh Hoa commune, Giong Trom district,<br>Ben Tre province  |
|     |                    | T-SP21                    |                                                             |
|     |                    | T-SP22                    |                                                             |
| 2   |                    | T-SP05                    | 10°11'04.9"N 106°22'43.9"E<br>10.184680, 106.378864         |
|     |                    | T-SP06                    | Son Phu commune, Giong Trom district,<br>Ben Tre province   |
| 3   |                    | T-SP07                    | 10°11'15.2"N 106°29'02.4"E<br>10.187558, 106.483993         |
|     |                    | T-SP08                    | Binh Hoa commune, Giong Trom district,<br>Ben Tre province  |
| 4   |                    | T-SP09                    | 10°14'51.3"N 106°26'54.5"E<br>10.247594, 106.448467         |
|     |                    | T-SP10                    | Phong Nam commune, Giong Trom<br>district, Ben Tre province |
| 5   |                    | T-SP11                    | 10°10'53.0"N 106°23'04.8"E<br>10.181387, 106.384671         |
|     |                    | T-SP12                    | Son Phu commune, Giong Trom district,<br>Ben Tre province   |
| 6   |                    | T-SP13                    | 10°11'17.6"N 106°29'30.4"E<br>10.188221, 106.491771         |
|     |                    | T-SP14                    | Binh Hoa commune, Giong Trom district,<br>Ben Tre province  |
| 7   |                    | T-SP15                    | 10°10'54.4"N 106°29'01.7"E<br>10.181784, 106.483806         |
|     |                    | T-SP16                    | Binh Hoa commune, Giong Trom district,<br>Ben Tre province  |
| 8   |                    | T-SP17                    | 10°10'35.6"N 106°28'48.5"E<br>10.176558, 106.480144         |
|     |                    | T-SP18                    | Binh Hoa commune, Giong Trom district,<br>Ben Tre province  |
| 9   |                    | T-SP19                    | 10°10'38.9"N 106°28'49.0"E<br>10.177460, 106.480267         |
|     |                    | T-SP20                    | Binh Hoa commune, Giong Trom district,<br>Ben Tre province  |
| 10  |                    | T-SP23                    | 10°17'16.9"N 106°19'46.3"E<br>10.288025, 106.329513         |
|     |                    | T-SP24                    | Tam Phuoc commune, Chau Thanh<br>district, Ben Tre province |
| 11  |                    | T-SP25                    | 10°16'54.7"N 106°19'50.0"E                                  |

|    |       |        |                                                                                   |
|----|-------|--------|-----------------------------------------------------------------------------------|
|    |       | T-SP26 | 10.281861, 106.330541<br>Tam Phuoc commune, Chau Thanh district, Ben Tre province |
|    |       | T-SP27 | 10°17'33.9"N 106°19'46.7"E<br>10.292759, 106.329640                               |
| 12 |       | T-SP28 | Tam Phuoc commune, Chau Thanh district, Ben Tre province                          |
|    |       | T-SP29 | 10°17'41.0"N 106°19'32.6"E<br>10.294708, 106.325734                               |
| 13 |       | T-SP30 | Tam Phuoc commune, Chau Thanh district, Ben Tre province                          |
|    | S-P08 | T-SP31 | 10°17'21.4"N 106°13'56.0"E<br>10.289266, 106.232224                               |
| 14 |       | T-SP32 | Quoi Thanh commune, Chau Thanh district, Ben Tre province                         |
|    |       | T-SP33 | 10°17'37.1"N 106°14'12.4"E<br>10.293649, 106.236786                               |
| 15 |       | T-SP34 | Quoi Thanh commune, Chau Thanh district, Ben Tre province                         |
|    |       | T-SP35 | 10°17'36.1"N 106°14'21.6"E<br>10.293350, 106.239330                               |
| 16 |       | T-SP36 | Quoi Thanh commune, Chau Thanh district, Ben Tre province                         |
|    | S-P09 | T-SP37 | 10°17'21.8"N 106°14'14.1"E<br>10.289384, 106.237235                               |
| 17 |       | T-SP38 | Quoi Thanh commune, Chau Thanh district, Ben Tre province                         |
|    |       | T-SP39 | 10°15'52.9"N 106°13'04.0"E<br>10.264684, 106.217763                               |
| 18 |       | T-SP40 | Tien Long commune, Chau Thanh district, Ben Tre province                          |
|    |       | T-SP41 | 10°15'32.3"N 106°12'38.5"E<br>10.258964, 106.210691                               |
| 19 | S-P02 | T-SP42 | Tien Long commune, Chau Thanh district, Ben Tre province                          |
|    |       | T-SP43 | 10°15'50.3"N 106°13'51.7"E<br>10.263973, 106.231028                               |
| 20 | S-P01 | T-SP44 | Tien Long commune, Chau Thanh district, Ben Tre province                          |
|    |       | T-SP45 | 10°15'37.6"N 106°13'54.6"E<br>10.260435, 106.231824                               |
| 21 | S-P05 | T-SP46 | Tien Thuy commune, Chau Thanh district, Ben Tre province                          |
|    | S-P04 | T-SP47 | 10°15'34.0"N 106°13'52.5"E<br>10.259446, 106.231261                               |
| 22 | S-P06 | T-SP48 | Tien Thuy commune, Chau Thanh district, Ben Tre province                          |
|    | S-P07 |        |                                                                                   |
|    |       | T-SP49 | 10°15'39.2"N 106°13'55.8"E<br>10.260887, 106.232177                               |
| 23 | S-P03 | T-SP50 | Tien Thuy commune, Chau Thanh district, Ben Tre province                          |
|    |       |        | 10°15'43.5"N 106°27'45.5"E                                                        |

|    |       |                                                                                                                 |
|----|-------|-----------------------------------------------------------------------------------------------------------------|
| 24 | S-P10 | 10.262069, 106.462636<br>Long Hoa commune, Binh Dai district,<br>Ben Tre province                               |
| 25 | S-P11 | 10°15'54.2"N 106°27'45.1"E<br>10.265066, 106.462539<br>Long Hoa commune, Binh Dai district,<br>Ben Tre province |
